# Supplementary material for: Single-cell RNA-seq analysis reveals BHLHE40-driven pro-tumour neutrophils with hyperactivated glycolysis in pancreatic tumour microenvironment
Source: HighWire-hosted journal article supplement (doi:10.1136/gutjnl-2021-326070), 2022-06-10
Supplement: gutjnl-2021-326070supp006_data_supplement.xlsx [file gutjnl-2021-326070supp006_data_supplement.xlsx]

## Sheet: ST_TAN_subcluster_marker
Table S6. List of marker genes for each TAN subcluster from PDAC patients
TAN subcluster	Gene	avg_logFC	pct.1	pct.2	P value	Adjusted p value
TAN-0	CXCR4	0.69759	0.932	0.773	1.87116e-165	6.79623e-161
TAN-0	ITM2B	0.605596	0.913	0.784	2.56964e-132	9.33319e-128
TAN-0	FOS	0.433459	0.976	0.878	1.32767e-104	4.82222e-100
TAN-0	DUSP1	0.398542	0.954	0.849	1.00421e-85	3.64739e-81
TAN-0	SLA	0.58998	0.717	0.514	1.1163e-74	4.0545e-70
TAN-0	RNASE6	1.28287	0.298	0.106	5.47617e-69	1.989e-64
TAN-0	SMAP2	0.454925	0.76	0.533	2.79329e-66	1.01455e-61
TAN-0	RGS2	0.446167	0.715	0.476	5.90478e-61	2.14468e-56
TAN-0	OGFRL1	0.807804	0.442	0.239	6.8054e-60	2.47179e-55
TAN-0	TSC22D3	0.452261	0.731	0.555	6.89693e-59	2.50504e-54
TAN-0	HLA-C	0.314848	0.932	0.873	1.85285e-55	6.72973e-51
TAN-0	SORL1	0.664869	0.525	0.34	1.78622e-53	6.48772e-49
TAN-0	MCL1	0.381599	0.847	0.722	1.11432e-52	4.04734e-48
TAN-0	IL13RA1	0.829295	0.375	0.196	6.55814e-51	2.38198e-46
TAN-0	ALOX5AP	0.287765	0.949	0.882	3.87763e-44	1.40839e-39
TAN-0	CYBB	0.704886	0.368	0.197	4.18332e-44	1.51942e-39
TAN-0	RCSD1	0.868116	0.289	0.142	2.39721e-39	8.70692e-35
TAN-0	SARAF	0.731036	0.369	0.222	5.03891e-37	1.83018e-32
TAN-0	BTG1	0.522939	0.615	0.5	1.07364e-36	3.89956e-32
TAN-0	TMSB4X	0.273287	0.922	0.925	2.42106e-36	8.79354e-32
TAN-0	SEC14L1	0.412302	0.696	0.586	2.61273e-36	9.48969e-32
TAN-0	EGR1	0.480458	0.682	0.556	5.55496e-34	2.01762e-29
TAN-0	EVI2B	0.391226	0.655	0.535	8.63381e-32	3.13589e-27
TAN-0	GAPT	0.80968	0.271	0.145	1.816e-31	6.59588e-27
TAN-0	MCEMP1	0.712528	0.361	0.23	1.78013e-30	6.46562e-26
TAN-0	CLEC4E	0.31636	0.664	0.533	2.09467e-27	7.60805e-23
TAN-0	IFNGR1	0.400993	0.562	0.454	4.84303e-26	1.75904e-21
TAN-0	DOCK5	0.661745	0.331	0.221	8.68227e-25	3.15349e-20
TAN-0	FPR1	0.290108	0.775	0.676	6.00348e-24	2.18053e-19
TAN-0	OLR1	0.593991	0.335	0.213	6.48444e-24	2.35521e-19
TAN-0	CD74	0.501342	0.617	0.581	1.18961e-21	4.3208e-17
TAN-0	KIAA1551	0.43351	0.466	0.349	1.20395e-21	4.37285e-17
TAN-0	PHC2	0.426192	0.461	0.359	2.44591e-21	8.88379e-17
TAN-0	RNF149	0.259289	0.733	0.646	5.37489e-21	1.95221e-16
TAN-0	FKBP5	0.444722	0.402	0.284	5.38314e-21	1.95521e-16
TAN-0	ABHD5	0.502621	0.35	0.246	9.35675e-20	3.39847e-15
TAN-0	YIPF4	0.604245	0.253	0.161	7.8403e-18	2.84767e-13
TAN-0	ARL6IP5	0.526233	0.28	0.186	5.09171e-17	1.84936e-12
TAN-0	PECAM1	0.621068	0.261	0.175	9.20902e-17	3.34481e-12
TAN-0	CSF3R	0.254539	0.79	0.734	9.6877e-17	3.51867e-12
TAN-0	WIPF1	0.409119	0.463	0.378	1.31114e-16	4.76221e-12
TAN-0	CPD	0.4577	0.431	0.35	1.43596e-16	5.21555e-12
TAN-0	FTH1P20	0.357123	0.553	0.481	2.0556e-16	7.46614e-12
TAN-0	FYB1	0.268288	0.591	0.491	2.12886e-16	7.73222e-12
TAN-0	BOD1L1	0.430894	0.423	0.333	2.46656e-16	8.95879e-12
TAN-0	LAT2	0.53969	0.276	0.189	1.85985e-15	6.75516e-11
TAN-0	SKIL	0.378817	0.418	0.332	5.41692e-15	1.96748e-10
TAN-0	IRS2	0.331599	0.466	0.376	1.07179e-14	3.89285e-10
TAN-0	CALM2	0.423244	0.384	0.299	1.96022e-14	7.11972e-10
TAN-0	HLA-DRA	0.618646	0.414	0.362	2.35883e-13	8.56751e-09
TAN-0	MSN	0.393522	0.411	0.341	4.9337e-13	1.79197e-08
TAN-0	CELF2	0.462304	0.309	0.233	1.01843e-12	3.69904e-08
TAN-0	MEGF9	0.276784	0.353	0.257	1.20151e-12	4.36401e-08
TAN-0	LYST	0.470633	0.319	0.242	2.0885e-12	7.58563e-08
TAN-0	AL034397.3	0.407971	0.387	0.309	2.71681e-12	9.86774e-08
TAN-0	H3F3AP4	0.445538	0.341	0.27	6.77601e-12	2.46111e-07
TAN-0	VSIR	0.356444	0.4	0.327	1.32567e-11	4.81497e-07
TAN-0	CEBPD	0.358156	0.319	0.241	2.39548e-11	8.70061e-07
TAN-0	IGKC	0.464601	0.339	0.269	2.56321e-11	9.30983e-07
TAN-0	TMEM154	0.323633	0.449	0.38	3.37274e-11	1.22501e-06
TAN-0	SMCHD1	0.365514	0.464	0.396	2.22051e-10	8.06511e-06
TAN-0	ZCCHC6	0.388892	0.309	0.243	7.5443e-10	2.74017e-05
TAN-0	CTSC	0.291057	0.354	0.28	1.25126e-09	4.54469e-05
TAN-0	LRRFIP1	0.319564	0.395	0.34	8.46711e-09	0.000307534
TAN-0	MGEA5	0.404181	0.298	0.238	1.25171e-08	0.000454635
TAN-0	TAX1BP1	0.371547	0.323	0.264	1.46148e-08	0.000530825
TAN-0	PTPN12	0.326726	0.377	0.323	2.03728e-08	0.000739959
TAN-0	YPEL3	0.276904	0.417	0.369	4.35776e-08	0.00158278
TAN-0	RAP1A	0.384707	0.324	0.273	4.87572e-08	0.00177091
TAN-0	ACTR2	0.251998	0.429	0.37	7.30572e-08	0.00265351
TAN-0	RSRP1	0.341654	0.286	0.235	1.00153e-06	0.0363765
TAN-0	YPEL5	0.297502	0.373	0.333	1.1147e-06	0.0404869
TAN-0	LRRK2	0.288246	0.295	0.246	3.08802e-06	0.11216
TAN-0	IRAK3	0.263219	0.298	0.248	4.9707e-06	0.180541
TAN-0	PREX1	0.265032	0.378	0.339	8.90044e-06	0.323273
TAN-0	ROCK1	0.35268	0.283	0.239	1.24261e-05	0.451327
TAN-0	SERINC1	0.257232	0.319	0.274	1.38228e-05	0.502056
TAN-0	TAF7	0.286213	0.285	0.244	2.38697e-05	0.86697
TAN-0	H3F3A	0.28124	0.397	0.366	4.30629e-05	1
TAN-0	PTBP3	0.313677	0.279	0.243	8.88444e-05	1
TAN-0	ADIPOR1	0.333007	0.283	0.253	0.000106689	1
TAN-0	PILRA	0.289305	0.255	0.231	0.00193078	1
TAN-0	SF3B1	0.285371	0.267	0.243	0.00248864	1
TAN-0	CALM1	0.265177	0.259	0.232	0.00298979	1
TAN-0	GABARAPL1	0.264387	0.273	0.256	0.00995469	1
TAN-1	VEGFA	2.04093	0.727	0.176	4.00341e-279	1.45408e-274
TAN-1	PLPP3	2.7569	0.287	0.013	1.74469e-204	6.33689e-200
TAN-1	LGALS3	2.59446	0.401	0.051	6.28881e-201	2.28416e-196
TAN-1	C15orf48	1.73713	0.585	0.146	3.14185e-186	1.14115e-181
TAN-1	PLAU	2.08914	0.485	0.105	2.67106e-175	9.70155e-171
TAN-1	RALGDS	2.19401	0.314	0.03	4.85068e-175	1.76181e-170
TAN-1	LDHA	1.49704	0.68	0.252	1.70523e-166	6.19355e-162
TAN-1	BHLHE40	1.59834	0.67	0.253	4.81943e-162	1.75046e-157
TAN-1	SLC43A3	2.31822	0.272	0.023	2.11367e-158	7.67704e-154
TAN-1	CCL3L3	1.60731	0.722	0.312	3.79496e-147	1.37837e-142
TAN-1	PLIN2	2.38133	0.317	0.046	4.10418e-142	1.49068e-137
TAN-1	CD83	1.62336	0.397	0.078	7.80649e-140	2.8354e-135
TAN-1	TPI1	1.22286	0.717	0.337	6.17722e-134	2.24363e-129
TAN-1	SLC3A2	1.59523	0.408	0.091	2.55505e-132	9.2802e-128
TAN-1	CCRL2	1.43178	0.487	0.134	4.90053e-131	1.77992e-126
TAN-1	RAB20	1.5313	0.416	0.096	9.12687e-130	3.31497e-125
TAN-1	PLEKHB2	1.47279	0.534	0.173	6.65016e-128	2.41541e-123
TAN-1	ENO1	1.28684	0.616	0.243	4.59138e-125	1.66764e-120
TAN-1	CAST	1.80208	0.401	0.097	3.47327e-123	1.26153e-118
TAN-1	BRI3	1.0957	0.698	0.365	2.13163e-111	7.7423e-107
TAN-1	LPCAT1	1.6523	0.312	0.06	1.43117e-110	5.19815e-106
TAN-1	TPT1	0.838629	0.912	0.816	1.29898e-109	4.71803e-105
TAN-1	ERO1A	1.53366	0.393	0.103	2.68975e-108	9.76946e-104
TAN-1	HK2	1.58604	0.429	0.127	8.80212e-108	3.19702e-103
TAN-1	IRAK2	1.62991	0.288	0.054	1.48476e-101	5.39279e-97
TAN-1	CDKN1A	1.27082	0.383	0.1	5.42969e-99	1.97212e-94
TAN-1	PPIF	0.85982	0.599	0.253	3.69723e-93	1.34287e-88
TAN-1	GADD45B	1.43062	0.388	0.114	3.47538e-92	1.26229e-87
TAN-1	HPCAL1	1.36193	0.423	0.14	2.02378e-91	7.35056e-87
TAN-1	CXCL8	0.793583	0.981	0.873	2.2211e-91	8.06727e-87
TAN-1	ATP6V1C1	1.20262	0.427	0.141	1.06228e-87	3.85829e-83
TAN-1	PIM3	1.48087	0.308	0.076	1.03357e-86	3.75404e-82
TAN-1	PI3	1.98915	0.255	0.051	1.00149e-84	3.6375e-80
TAN-1	ZNF267	1.15594	0.456	0.168	1.91287e-83	6.94774e-79
TAN-1	ERBIN	1.56399	0.34	0.098	1.21016e-82	4.39541e-78
TAN-1	MAFF	1.34673	0.459	0.179	4.4977e-82	1.63361e-77
TAN-1	BNIP3L	1.11529	0.57	0.281	3.46533e-81	1.25864e-76
TAN-1	CCL4L2	1.5249	0.587	0.293	2.19504e-79	7.97259e-75
TAN-1	KCNAB2	1.4037	0.285	0.07	1.04961e-78	3.8123e-74
TAN-1	CD300A	1.19171	0.417	0.149	1.49662e-78	5.43586e-74
TAN-1	CTSD	1.41456	0.345	0.11	1.47796e-74	5.36812e-70
TAN-1	SLC2A3	0.727354	0.78	0.529	1.62912e-69	5.91712e-65
TAN-1	RAB7A	0.823107	0.712	0.474	8.49379e-69	3.08503e-64
TAN-1	KDM3A	1.20041	0.335	0.108	1.61684e-67	5.87254e-63
TAN-1	PHACTR1	0.855444	0.586	0.303	1.19017e-66	4.32282e-62
TAN-1	CANX	1.18645	0.386	0.144	8.39214e-66	3.04811e-61
TAN-1	IFNGR2	1.1229	0.436	0.187	4.81971e-64	1.75057e-59
TAN-1	TNFSF14	1.3579	0.266	0.073	8.61697e-64	3.12977e-59
TAN-1	MAP4K4	1.23857	0.336	0.115	1.3101e-63	4.7584e-59
TAN-1	LCP2	0.751769	0.74	0.48	1.3974e-62	5.07549e-58
TAN-1	RLF	1.01611	0.423	0.175	4.82801e-62	1.75358e-57
TAN-1	RAB1A	0.913118	0.506	0.243	1.04715e-61	3.80335e-57
TAN-1	P4HA1	1.13977	0.351	0.127	3.14632e-61	1.14277e-56
TAN-1	FCER1G	0.81958	0.686	0.434	4.30512e-60	1.56366e-55
TAN-1	PNRC1	0.699324	0.766	0.571	9.29759e-60	3.37698e-55
TAN-1	IVNS1ABP	0.563768	0.84	0.612	1.46263e-59	5.31243e-55
TAN-1	CYSTM1	1.01189	0.479	0.229	2.389e-59	8.6771e-55
TAN-1	NINJ1	1.01914	0.487	0.242	7.92166e-59	2.87723e-54
TAN-1	ASAH1	0.922608	0.588	0.339	8.07344e-59	2.93235e-54
TAN-1	CD63	0.887075	0.578	0.315	2.55218e-57	9.26978e-53
TAN-1	IL1RN	0.723748	0.616	0.333	4.04292e-57	1.46843e-52
TAN-1	CSTB	1.43337	0.32	0.116	1.18015e-56	4.28643e-52
TAN-1	HCAR2	0.940351	0.441	0.199	4.64454e-54	1.68694e-49
TAN-1	ANKRD12	0.804608	0.543	0.287	4.78312e-54	1.73728e-49
TAN-1	DNAJB9	1.22236	0.283	0.094	5.70939e-54	2.07371e-49
TAN-1	SPP1	1.15165	0.444	0.209	1.33752e-53	4.85799e-49
TAN-1	DDX21	1.21597	0.293	0.103	6.85542e-52	2.48996e-47
TAN-1	PLEK	0.585562	0.729	0.511	4.66461e-51	1.69423e-46
TAN-1	MARCKS	0.928464	0.466	0.229	5.00129e-51	1.81652e-46
TAN-1	PIK3AP1	1.08624	0.355	0.147	8.34798e-51	3.03207e-46
TAN-1	CCL4	1.63625	0.286	0.101	1.03657e-50	3.76493e-46
TAN-1	CCR1	0.9781	0.392	0.17	1.55837e-50	5.66017e-46
TAN-1	PKM	1.04308	0.299	0.108	1.84516e-50	6.7018e-46
TAN-1	TMEM140	0.984346	0.313	0.114	4.38779e-50	1.59369e-45
TAN-1	FAM177B	1.23577	0.291	0.106	6.48551e-49	2.3556e-44
TAN-1	PPP1R15A	0.790982	0.573	0.343	1.61715e-48	5.87367e-44
TAN-1	NDRG1	1.11562	0.335	0.137	1.79944e-47	6.53574e-43
TAN-1	MAP1LC3B	0.684066	0.66	0.436	1.17619e-46	4.27205e-42
TAN-1	ANXA5	1.03206	0.369	0.165	3.7801e-46	1.37297e-41
TAN-1	PATL1	1.06715	0.291	0.114	5.56488e-43	2.02122e-38
TAN-1	SOD2	0.699187	0.7	0.501	1.18032e-42	4.28703e-38
TAN-1	CDC42EP3	0.966441	0.302	0.119	1.46551e-42	5.32288e-38
TAN-1	CHMP4B	0.850402	0.392	0.187	4.88939e-42	1.77587e-37
TAN-1	LIMS1	0.854506	0.328	0.142	2.7878e-40	1.01256e-35
TAN-1	MGAT1	0.978288	0.298	0.124	8.47666e-40	3.07881e-35
TAN-1	ZNF292	0.83309	0.355	0.162	6.71367e-39	2.43847e-34
TAN-1	WTAP	0.958121	0.322	0.143	8.0773e-39	2.93376e-34
TAN-1	ARF1	0.686866	0.535	0.328	3.89395e-38	1.41432e-33
TAN-1	FOSL2	0.837047	0.399	0.204	6.88923e-38	2.50224e-33
TAN-1	ZFAND5	0.717182	0.447	0.239	8.00428e-38	2.90723e-33
TAN-1	NFKBIA	0.582323	0.751	0.587	5.42746e-36	1.97131e-31
TAN-1	IL1B	0.791386	0.331	0.147	6.74988e-36	2.45162e-31
TAN-1	GPCPD1	0.913798	0.391	0.207	8.53013e-36	3.09823e-31
TAN-1	PAG1	0.769659	0.424	0.229	2.46665e-35	8.95911e-31
TAN-1	BCL2A1	0.370491	0.891	0.741	3.10898e-35	1.12921e-30
TAN-1	PLAUR	0.603976	0.599	0.397	3.48928e-35	1.26734e-30
TAN-1	MT-RNR2	0.2848	1	0.998	1.30292e-34	4.73234e-30
TAN-1	SLC15A4	0.843937	0.28	0.121	2.18209e-33	7.92557e-29
TAN-1	TNIP1	0.939111	0.251	0.104	5.18299e-33	1.88251e-28
TAN-1	ATP6V1E1	0.801165	0.29	0.129	3.9246e-32	1.42546e-27
TAN-1	ZFP36L1	0.761825	0.573	0.396	2.77138e-30	1.00659e-25
TAN-1	ETS2	0.651843	0.47	0.282	2.98266e-30	1.08333e-25
TAN-1	YWHAE	0.835342	0.255	0.111	3.45184e-30	1.25374e-25
TAN-1	HBEGF	0.705529	0.264	0.115	5.06844e-30	1.84091e-25
TAN-1	SPAG9	0.797936	0.322	0.16	7.00073e-30	2.54274e-25
TAN-1	GRINA	0.638136	0.427	0.245	8.43943e-30	3.06528e-25
TAN-1	ZEB2	0.88377	0.34	0.178	1.17696e-29	4.27483e-25
TAN-1	SDCBP	0.495475	0.774	0.657	1.60917e-29	5.84467e-25
TAN-1	HNRNPC	0.630292	0.535	0.357	2.78141e-29	1.01023e-24
TAN-1	SGK1	0.690917	0.319	0.16	1.10108e-27	3.99922e-23
TAN-1	TM9SF3	0.686223	0.279	0.131	2.45717e-27	8.92469e-23
TAN-1	FTH1P10	0.615555	0.374	0.207	3.72089e-26	1.35147e-21
TAN-1	NBN	0.60749	0.433	0.261	4.7403e-26	1.72172e-21
TAN-1	RPS28	0.845355	0.263	0.128	6.6438e-26	2.41309e-21
TAN-1	CREBRF	0.654777	0.431	0.265	9.66969e-26	3.51213e-21
TAN-1	PTMA	0.806435	0.347	0.192	1.80979e-25	6.57332e-21
TAN-1	NFE2L2	0.581553	0.452	0.287	9.9353e-25	3.6086e-20
TAN-1	CD44	0.647989	0.486	0.317	1.02853e-24	3.73571e-20
TAN-1	GABARAPL2	0.803343	0.327	0.181	4.85168e-24	1.76218e-19
TAN-1	FLOT1	0.556161	0.452	0.289	6.03578e-24	2.19226e-19
TAN-1	TPP1	0.659821	0.391	0.234	2.17704e-23	7.90721e-19
TAN-1	PLK3	0.679191	0.267	0.134	1.15309e-22	4.18815e-18
TAN-1	ATP6V1G1	0.648907	0.298	0.161	1.81965e-21	6.60915e-17
TAN-1	N4BP1	0.596506	0.386	0.234	5.08154e-21	1.84567e-16
TAN-1	PGK1	0.579164	0.476	0.328	5.35553e-21	1.94518e-16
TAN-1	PSAP	0.574501	0.674	0.555	6.27572e-21	2.2794e-16
TAN-1	SMIM25	0.539503	0.51	0.373	1.07834e-20	3.91665e-16
TAN-1	TXN	0.682511	0.34	0.204	1.41152e-20	5.12679e-16
TAN-1	NOP10	0.50077	0.444	0.291	5.62085e-20	2.04155e-15
TAN-1	CARD16	0.600407	0.333	0.195	2.33702e-19	8.4883e-15
TAN-1	HIF1A	0.426793	0.563	0.409	2.50948e-19	9.11469e-15
TAN-1	CCNL1	0.488276	0.528	0.375	3.70005e-19	1.3439e-14
TAN-1	FNDC3B	0.582247	0.328	0.192	4.67588e-19	1.69833e-14
TAN-1	APLP2	0.52645	0.464	0.327	1.41542e-17	5.14094e-13
TAN-1	EML4	0.518898	0.29	0.166	4.10982e-17	1.49273e-12
TAN-1	RPS16	0.633791	0.256	0.142	4.61445e-17	1.67601e-12
TAN-1	RHOH	0.453931	0.351	0.216	5.00624e-17	1.81832e-12
TAN-1	IL2RG	0.51587	0.357	0.228	4.11552e-16	1.4948e-11
TAN-1	TNFRSF1B	0.506443	0.463	0.333	5.02023e-16	1.8234e-11
TAN-1	CTSB	0.399956	0.481	0.342	5.64638e-16	2.05082e-11
TAN-1	SUSD6	0.657682	0.295	0.181	6.72258e-16	2.44171e-11
TAN-1	ETF1	0.544545	0.288	0.171	9.121e-16	3.31284e-11
TAN-1	FNIP1	0.551381	0.279	0.164	1.00788e-15	3.66071e-11
TAN-1	NFKBIZ	0.47745	0.333	0.21	7.25404e-15	2.63474e-10
TAN-1	GRN	0.591966	0.277	0.167	9.11987e-15	3.31243e-10
TAN-1	CNBP	0.422114	0.387	0.256	1.16813e-14	4.24276e-10
TAN-1	FTH1	0.52734	0.331	0.217	1.32562e-14	4.8148e-10
TAN-1	WBP2	0.497738	0.347	0.23	3.12165e-14	1.13382e-09
TAN-1	ITGAX	0.473133	0.473	0.356	3.249e-14	1.18007e-09
TAN-1	PRRC2C	0.365245	0.385	0.257	8.41057e-14	3.0548e-09
TAN-1	MBP	0.645269	0.331	0.222	1.05297e-13	3.82448e-09
TAN-1	UBE2B	0.404358	0.483	0.355	2.10928e-13	7.66111e-09
TAN-1	RPS27	0.440268	0.394	0.282	7.30258e-13	2.65237e-08
TAN-1	IER5	0.395833	0.316	0.201	8.53161e-13	3.09877e-08
TAN-1	RPL27A	0.403183	0.372	0.256	1.0263e-12	3.72764e-08
TAN-1	EEF1A1	0.460177	0.27	0.166	1.0274e-12	3.73161e-08
TAN-1	RBPJ	0.453186	0.408	0.289	1.11053e-12	4.03355e-08
TAN-1	FGR	0.333222	0.56	0.437	1.16265e-12	4.22286e-08
TAN-1	RYBP	0.406444	0.43	0.315	2.03915e-12	7.40638e-08
TAN-1	WSB1	0.523292	0.535	0.441	2.21453e-12	8.04339e-08
TAN-1	FTL	0.28898	0.937	0.881	1.58266e-11	5.74839e-07
TAN-1	RPL34	0.345389	0.466	0.36	1.78427e-11	6.48066e-07
TAN-1	CD164	0.514378	0.276	0.179	2.41723e-11	8.77961e-07
TAN-1	RPL32	0.477395	0.302	0.204	3.60702e-11	1.31011e-06
TAN-1	RPL37	0.353923	0.367	0.257	3.90534e-11	1.41846e-06
TAN-1	IGSF6	0.254274	0.616	0.515	6.30737e-11	2.2909e-06
TAN-1	ARHGAP26	0.502793	0.264	0.174	2.58289e-10	9.38132e-06
TAN-1	HNRNPU	0.352702	0.363	0.258	3.4433e-10	1.25064e-05
TAN-1	CD82	0.414075	0.309	0.215	5.60029e-10	2.03408e-05
TAN-1	RPL38	0.431848	0.259	0.174	2.75034e-09	9.9895e-05
TAN-1	ATP6V1B2	0.34022	0.498	0.405	4.21555e-09	0.000153113
TAN-1	C4orf3	0.340965	0.381	0.285	6.43644e-09	0.000233778
TAN-1	RILPL2	0.406321	0.367	0.272	7.13004e-09	0.00025897
TAN-1	BRD4	0.421952	0.251	0.171	1.08661e-08	0.000394668
TAN-1	IFI16	0.321323	0.333	0.241	2.34482e-08	0.000851663
TAN-1	ACTN1	0.369799	0.353	0.27	3.14596e-08	0.00114264
TAN-1	CLEC2B	0.376205	0.307	0.223	1.12985e-07	0.00410372
TAN-1	KDM6B	0.314691	0.349	0.265	1.72342e-07	0.00625963
TAN-1	NAMPTP1	0.325214	0.285	0.205	5.49203e-07	0.0199476
TAN-1	RPS27A	0.31728	0.327	0.251	9.42394e-07	0.0342287
TAN-1	RPS29	0.345543	0.266	0.197	1.19371e-06	0.0433566
TAN-1	CHMP2A	0.269701	0.309	0.229	2.17383e-06	0.0789557
TAN-1	RPL37A	0.306611	0.252	0.184	2.21179e-06	0.0803344
TAN-1	CSRNP1	0.280837	0.328	0.25	2.40355e-06	0.0872995
TAN-1	RPS11	0.255699	0.265	0.197	3.22309e-06	0.117066
TAN-1	RPL21	0.261442	0.323	0.246	3.31623e-06	0.120449
TAN-1	SIRPA	0.320022	0.273	0.208	4.72508e-06	0.17162
TAN-1	CASP4	0.346888	0.363	0.297	6.90669e-06	0.250858
TAN-1	RPL23	0.27624	0.305	0.236	9.11941e-06	0.331226
TAN-1	BASP1	0.419281	0.507	0.454	1.34955e-05	0.490171
TAN-1	QKI	0.277687	0.293	0.228	3.10312e-05	1
TAN-1	DOK3	0.304373	0.285	0.224	5.25019e-05	1
TAN-1	IRAK3	0.280005	0.324	0.261	9.3039e-05	1
TAN-2	NLRP3	2.1622	0.455	0.065	2.72908e-193	9.91228e-189
TAN-2	RHOH	1.68121	0.658	0.172	1.39199e-184	5.05583e-180
TAN-2	N4BP2	2.21536	0.364	0.039	3.93104e-178	1.42779e-173
TAN-2	CD69	1.58603	0.739	0.247	1.91006e-173	6.93752e-169
TAN-2	MIR3945HG	2.40132	0.325	0.031	2.88719e-172	1.04865e-167
TAN-2	LCP2	1.10206	0.915	0.463	3.69462e-167	1.34192e-162
TAN-2	PDE4B	1.44995	0.688	0.236	6.39507e-146	2.32275e-141
TAN-2	IL1RN	1.40386	0.764	0.322	9.44404e-138	3.43017e-133
TAN-2	ADM	1.36594	0.773	0.341	1.197e-129	4.34761e-125
TAN-2	TPM4	1.28485	0.594	0.206	1.92663e-112	6.99772e-108
TAN-2	CD44	1.10499	0.694	0.291	3.40886e-111	1.23813e-106
TAN-2	FCGR2A	1.3726	0.676	0.302	1.86622e-107	6.77831e-103
TAN-2	PPIF	1.4888	0.633	0.262	2.09682e-102	7.61588e-98
TAN-2	PLEK	1.20124	0.838	0.503	7.11036e-101	2.58255e-96
TAN-2	IVNS1ABP	0.829272	0.906	0.611	7.78459e-100	2.82744e-95
TAN-2	ECHDC1	1.62384	0.333	0.067	1.24705e-99	4.52942e-95
TAN-2	IL4R	1.58376	0.299	0.058	5.25345e-93	1.9081e-88
TAN-2	IGSF6	0.894642	0.82	0.487	2.37302e-88	8.61906e-84
TAN-2	FPR2	0.896792	0.781	0.436	6.68377e-87	2.42761e-82
TAN-2	SLC2A3	0.895076	0.857	0.527	1.3939e-83	5.06279e-79
TAN-2	SRGN	0.398404	0.997	0.947	2.7268e-79	9.90401e-75
TAN-2	IL1B	1.58808	0.426	0.14	3.50301e-79	1.27233e-74
TAN-2	S100A8	0.540567	0.848	0.477	8.19762e-79	2.97746e-74
TAN-2	DUSP6	1.40874	0.433	0.144	1.22676e-78	4.4557e-74
TAN-2	LITAF	0.663942	0.96	0.824	2.49459e-71	9.06061e-67
TAN-2	CISH	1.26015	0.312	0.081	9.01544e-71	3.2745e-66
TAN-2	SOCS3	1.26289	0.616	0.32	2.40637e-70	8.74016e-66
TAN-2	HBEGF	1.40797	0.352	0.107	6.04519e-68	2.19567e-63
TAN-2	HCAR2	1.13977	0.49	0.201	2.91522e-67	1.05884e-62
TAN-2	IFITM2	0.445755	0.991	0.863	4.30567e-66	1.56386e-61
TAN-2	PFKFB3	1.37466	0.321	0.092	5.54607e-66	2.01439e-61
TAN-2	DCUN1D3	1.32971	0.275	0.068	2.7339e-65	9.92979e-61
TAN-2	ACTN1	0.982724	0.532	0.245	2.00369e-63	7.27759e-59
TAN-2	CHD1	1.03838	0.451	0.175	5.40668e-62	1.96376e-57
TAN-2	GK	0.988972	0.479	0.193	1.53569e-61	5.57777e-57
TAN-2	N4BP1	0.942134	0.505	0.221	5.94478e-60	2.1592e-55
TAN-2	TNFRSF1A	0.930024	0.474	0.195	5.6274e-58	2.04393e-53
TAN-2	RNF19B	0.955349	0.504	0.22	1.81366e-57	6.58738e-53
TAN-2	NAMPT	0.421859	0.985	0.907	2.59361e-57	9.42026e-53
TAN-2	SELL	0.69997	0.666	0.34	6.38447e-57	2.3189e-52
TAN-2	IFITM3	0.805439	0.792	0.542	5.38029e-56	1.95418e-51
TAN-2	CASP4	0.795954	0.558	0.268	4.20421e-54	1.52701e-49
TAN-2	HIF1A	0.712507	0.68	0.397	3.44889e-53	1.25267e-48
TAN-2	ITGAX	0.851351	0.605	0.34	7.45756e-53	2.70866e-48
TAN-2	BCL2A1	0.469852	0.937	0.74	8.00273e-53	2.90667e-48
TAN-2	CLEC7A	0.875912	0.563	0.308	4.47824e-49	1.62654e-44
TAN-2	TLR4	0.850258	0.57	0.301	1.43135e-48	5.19881e-44
TAN-2	SAT1	0.441874	0.985	0.884	5.02102e-48	1.82368e-43
TAN-2	TREM1	0.536845	0.814	0.563	1.32882e-45	4.82641e-41
TAN-2	CXCL16	0.643861	0.645	0.369	1.80647e-45	6.56128e-41
TAN-2	VASP	0.62605	0.711	0.441	2.54721e-44	9.25171e-40
TAN-2	PTAFR	0.64053	0.623	0.351	6.68011e-43	2.42628e-38
TAN-2	CYTH4	1.06322	0.283	0.099	9.83562e-43	3.5724e-38
TAN-2	PFN1	0.610191	0.778	0.57	1.33332e-42	4.84275e-38
TAN-2	XBP1	1.06409	0.265	0.087	1.93328e-42	7.02188e-38
TAN-2	B3GNT5	0.905689	0.336	0.129	2.03187e-41	7.37997e-37
TAN-2	CFL1	0.492987	0.834	0.639	1.32903e-40	4.82717e-36
TAN-2	ACTB	0.446091	0.973	0.872	3.20566e-40	1.16433e-35
TAN-2	ETS2	0.68268	0.532	0.28	2.44783e-39	8.89075e-35
TAN-2	CASS4	0.922289	0.306	0.117	1.89149e-38	6.87007e-34
TAN-2	CSF2RB	0.696585	0.533	0.285	2.63008e-37	9.55272e-33
TAN-2	PHF20L1	0.688909	0.473	0.233	9.21316e-37	3.34631e-32
TAN-2	OSM	0.657168	0.546	0.302	1.19714e-36	4.34812e-32
TAN-2	GPR65	1.08154	0.268	0.099	1.46141e-36	5.308e-32
TAN-2	PTEN	0.641637	0.644	0.395	2.20629e-36	8.01348e-32
TAN-2	DNTTIP2	0.847028	0.303	0.119	3.76757e-36	1.36842e-31
TAN-2	YWHAZ	0.503954	0.738	0.499	7.26943e-35	2.64033e-30
TAN-2	MARCKS	0.806787	0.454	0.241	3.87135e-34	1.40611e-29
TAN-2	IL1R2	0.522095	0.726	0.486	3.81419e-33	1.38535e-28
TAN-2	DDX60L	0.824608	0.43	0.227	2.99103e-32	1.08637e-27
TAN-2	CD53	0.386728	0.876	0.714	8.74856e-32	3.17757e-27
TAN-2	TRIB1	0.551557	0.588	0.353	3.27098e-31	1.18805e-26
TAN-2	PGD	0.840306	0.352	0.17	3.89531e-31	1.41482e-26
TAN-2	ACSL1	0.662931	0.554	0.337	8.19604e-31	2.97688e-26
TAN-2	TLR1	0.829799	0.343	0.163	8.22394e-31	2.98702e-26
TAN-2	CD93	0.788435	0.368	0.179	8.48866e-31	3.08317e-26
TAN-2	ARRB2	0.541106	0.657	0.44	2.28859e-30	8.3124e-26
TAN-2	CMTM6	0.656286	0.641	0.441	1.27278e-29	4.62285e-25
TAN-2	KDM6B	0.667839	0.451	0.252	1.75882e-28	6.38821e-24
TAN-2	CXCL8	0.330829	0.954	0.882	3.49041e-28	1.26775e-23
TAN-2	MPP1	0.878561	0.252	0.104	1.7233e-27	6.25918e-23
TAN-2	PICALM	0.559333	0.557	0.351	1.82372e-27	6.62393e-23
TAN-2	CSRNP1	0.60879	0.433	0.237	3.64321e-27	1.32325e-22
TAN-2	ANXA11	0.746326	0.312	0.148	6.30873e-27	2.29139e-22
TAN-2	CARD16	0.676101	0.377	0.193	1.06929e-26	3.88376e-22
TAN-2	FFAR2	0.74552	0.355	0.182	3.0267e-26	1.09933e-21
TAN-2	IL1RAP	0.556936	0.511	0.298	7.89571e-26	2.8678e-21
TAN-2	PAG1	0.605353	0.43	0.237	1.09844e-25	3.98965e-21
TAN-2	PELI1	0.424817	0.666	0.442	3.62657e-25	1.31721e-20
TAN-2	NCF2	0.379199	0.735	0.524	4.3564e-25	1.58229e-20
TAN-2	AZIN1	0.792084	0.306	0.148	6.32906e-25	2.29878e-20
TAN-2	S100A9	0.313036	0.689	0.496	6.99478e-25	2.54058e-20
TAN-2	LIMK2	0.763678	0.268	0.123	5.11031e-24	1.85611e-19
TAN-2	KLF6	0.528363	0.685	0.513	6.23078e-24	2.26308e-19
TAN-2	CYTIP	0.553343	0.515	0.329	2.15122e-23	7.81346e-19
TAN-2	RBM47	0.766201	0.286	0.139	2.24923e-23	8.16942e-19
TAN-2	KCNJ15	0.694028	0.303	0.148	2.75642e-23	1.00116e-18
TAN-2	CCR1	0.64949	0.352	0.186	6.00535e-23	2.1812e-18
TAN-2	PLAU	0.588423	0.308	0.149	6.04586e-23	2.19592e-18
TAN-2	IRF2BP2	0.608798	0.32	0.16	6.87962e-23	2.49875e-18
TAN-2	CDKN1A	0.789996	0.271	0.13	1.82249e-22	6.61946e-18
TAN-2	RNF149	0.342177	0.834	0.665	4.74034e-22	1.72174e-17
TAN-2	ZFP36	0.470392	0.853	0.711	6.62641e-22	2.40678e-17
TAN-2	CYSTM1	0.459597	0.427	0.248	1.91648e-21	6.96085e-17
TAN-2	PIM1	0.548331	0.404	0.233	1.71623e-20	6.23353e-16
TAN-2	SERPINB1	0.56673	0.462	0.292	3.04348e-20	1.10542e-15
TAN-2	MAFF	0.334117	0.378	0.204	6.29989e-20	2.28818e-15
TAN-2	SGK1	0.798798	0.309	0.168	1.78441e-19	6.48116e-15
TAN-2	NABP1	0.508673	0.364	0.204	2.36347e-19	8.58438e-15
TAN-2	NOP10	0.456933	0.47	0.294	2.80707e-19	1.01956e-14
TAN-2	RIPOR2	0.332017	0.73	0.535	2.14063e-18	7.77498e-14
TAN-2	PPP1R15A	0.440287	0.538	0.359	4.59596e-18	1.6693e-13
TAN-2	NFKBIZ	0.594329	0.358	0.211	4.97002e-18	1.80516e-13
TAN-2	LUCAT1	0.578482	0.333	0.184	5.1542e-18	1.87206e-13
TAN-2	BHLHE40	0.287285	0.487	0.3	6.19846e-18	2.25134e-13
TAN-2	SMIM25	0.391709	0.552	0.373	6.86157e-18	2.49219e-13
TAN-2	ADAM8	0.5564	0.289	0.153	6.90508e-18	2.508e-13
TAN-2	IL6R	0.562636	0.358	0.213	1.82509e-17	6.62892e-13
TAN-2	RTN4	0.437276	0.461	0.296	3.18406e-17	1.15648e-12
TAN-2	TPM3	0.415888	0.616	0.456	5.17029e-17	1.8779e-12
TAN-2	RIPK2	0.627209	0.252	0.128	5.41271e-17	1.96595e-12
TAN-2	FGD4	0.602776	0.261	0.136	1.30044e-16	4.72334e-12
TAN-2	DOCK8	0.490946	0.351	0.207	2.50573e-16	9.10106e-12
TAN-2	PLSCR1	0.388091	0.495	0.321	4.01627e-16	1.45875e-11
TAN-2	GNAQ	0.696203	0.286	0.163	5.11205e-16	1.85675e-11
TAN-2	NEAT1	0.27684	0.909	0.823	5.11398e-16	1.85745e-11
TAN-2	FLOT1	0.359432	0.465	0.294	5.73742e-16	2.08389e-11
TAN-2	SIRPA	0.467856	0.342	0.2	6.87136e-16	2.49575e-11
TAN-2	MYL6	0.400613	0.505	0.346	8.38243e-16	3.04458e-11
TAN-2	CD300A	0.519712	0.311	0.177	1.21266e-15	4.4045e-11
TAN-2	THBD	0.604265	0.292	0.165	1.63228e-15	5.92862e-11
TAN-2	RAB31	0.66986	0.336	0.206	2.28966e-15	8.31627e-11
TAN-2	AQP9	0.360072	0.529	0.358	2.65132e-15	9.62985e-11
TAN-2	SAMSN1	0.430793	0.535	0.383	3.06054e-15	1.11162e-10
TAN-2	RAC2	0.325932	0.655	0.493	3.13553e-15	1.13886e-10
TAN-2	P2RY13	0.586162	0.359	0.222	5.3115e-15	1.92919e-10
TAN-2	GCA	0.405046	0.573	0.41	1.02074e-14	3.70744e-10
TAN-2	IER3	0.541028	0.267	0.148	1.19625e-14	4.3449e-10
TAN-2	CD55	0.40152	0.533	0.386	2.94895e-14	1.07109e-09
TAN-2	CEP170	0.502133	0.283	0.16	3.93373e-14	1.42877e-09
TAN-2	ACTG1	0.356468	0.809	0.704	4.18418e-14	1.51973e-09
TAN-2	PPP1R18	0.321865	0.605	0.443	2.37604e-13	8.63002e-09
TAN-2	FKBP1A	0.425977	0.414	0.276	2.8422e-13	1.03232e-08
TAN-2	ACTR3	0.326017	0.577	0.434	3.47846e-13	1.26341e-08
TAN-2	C4orf3	0.399513	0.421	0.283	7.29386e-13	2.6492e-08
TAN-2	SYK	0.542258	0.302	0.182	8.74223e-13	3.17527e-08
TAN-2	SLC25A37	0.259212	0.747	0.583	9.9875e-13	3.62756e-08
TAN-2	NDRG1	0.311998	0.272	0.155	2.18307e-12	7.92911e-08
TAN-2	ETF1	0.384449	0.296	0.175	3.23164e-12	1.17376e-07
TAN-2	LRG1	0.449244	0.386	0.259	4.92175e-12	1.78763e-07
TAN-2	CD58	0.434378	0.253	0.145	5.23141e-12	1.9001e-07
TAN-2	ZNF267	0.37896	0.324	0.201	1.15702e-11	4.20241e-07
TAN-2	NFE2L2	0.32866	0.436	0.296	1.2257e-11	4.45186e-07
TAN-2	CCNL1	0.27589	0.529	0.381	3.34066e-11	1.21336e-06
TAN-2	MX2	0.479776	0.292	0.184	7.02647e-11	2.55208e-06
TAN-2	RNF213	0.382916	0.28	0.173	7.40872e-11	2.69092e-06
TAN-2	ZEB2	0.308806	0.306	0.19	9.79798e-11	3.55872e-06
TAN-2	TMEM71	0.357647	0.255	0.151	1.11293e-10	4.04226e-06
TAN-2	NAMPTP1	0.327016	0.323	0.202	1.50838e-10	5.47858e-06
TAN-2	PAK2	0.376833	0.448	0.327	2.30352e-10	8.36661e-06
TAN-2	EML4	0.39732	0.278	0.173	2.74399e-10	9.96644e-06
TAN-2	HNRNPA3	0.361761	0.308	0.194	2.88064e-10	1.04628e-05
TAN-2	CREM	0.280334	0.411	0.282	3.19755e-10	1.16138e-05
TAN-2	MYL12A	0.302509	0.399	0.272	3.41282e-10	1.23957e-05
TAN-2	ATF4	0.39513	0.314	0.207	7.7421e-10	2.81201e-05
TAN-2	HCK	0.345631	0.29	0.184	1.03507e-09	3.75949e-05
TAN-2	DSE	0.432112	0.252	0.161	7.76167e-09	0.000281912
TAN-2	CTSC	0.394252	0.408	0.301	8.00058e-09	0.000290589
TAN-2	CFLAR	0.26117	0.473	0.348	8.82184e-09	0.000320418
TAN-2	TLN1	0.280729	0.289	0.192	1.91075e-08	0.000694004
TAN-2	ARHGAP9	0.299839	0.314	0.22	2.77622e-07	0.0100835
TAN-2	MYL12B	0.274392	0.457	0.356	4.69133e-07	0.0170394
TAN-2	RIT1	0.31727	0.253	0.171	7.99529e-07	0.0290397
TAN-2	ZYX	0.272033	0.306	0.215	9.22852e-07	0.0335189
TAN-2	RALB	0.295647	0.368	0.278	1.47803e-06	0.0536834
TAN-2	ANKRD12	0.286588	0.411	0.319	3.70092e-06	0.134421
TAN-2	ADGRG3	0.293653	0.274	0.19	3.80526e-06	0.138211
TAN-2	MYADM	0.293238	0.259	0.188	3.99497e-05	1
TAN-2	TRIM22	0.325839	0.286	0.225	0.000181992	1
TAN-3	S100A8	1.89928	0.966	0.474	1.39729e-226	5.0751e-222
TAN-3	S100A9	1.95974	0.94	0.47	4.16524e-224	1.51286e-219
TAN-3	VNN2	1.77289	0.766	0.187	1.23219e-221	4.47542e-217
TAN-3	MME	1.87391	0.539	0.098	4.92484e-174	1.78875e-169
TAN-3	SELL	1.33418	0.848	0.326	7.34414e-164	2.66747e-159
TAN-3	S100A12	2.52504	0.299	0.024	1.5505e-158	5.63156e-154
TAN-3	PYGL	1.93523	0.356	0.04	3.79078e-155	1.37685e-150
TAN-3	S100A4	1.60641	0.646	0.178	7.29977e-153	2.65135e-148
TAN-3	DYSF	2.05902	0.258	0.017	6.77592e-147	2.46108e-142
TAN-3	IFITM2	0.796538	0.991	0.867	9.72e-144	3.5304e-139
TAN-3	ALPL	2.09047	0.307	0.031	5.85651e-142	2.12714e-137
TAN-3	BASP1	1.01921	0.88	0.411	1.05665e-126	3.83787e-122
TAN-3	RGS2	0.958458	0.947	0.547	1.42434e-114	5.17336e-110
TAN-3	MEGF9	1.18813	0.706	0.253	1.44768e-111	5.25813e-107
TAN-3	HMGB2	1.59641	0.61	0.202	2.63477e-110	9.56974e-106
TAN-3	TMX4	1.53058	0.361	0.064	1.98264e-108	7.20113e-104
TAN-3	FAM129A	1.26478	0.619	0.204	2.21094e-106	8.03034e-102
TAN-3	JUNB	1.18385	0.866	0.54	5.50793e-106	2.00053e-101
TAN-3	APMAP	1.7787	0.298	0.045	4.88747e-104	1.77518e-99
TAN-3	C5AR1	0.920624	0.857	0.416	1.29126e-100	4.68999e-96
TAN-3	MNDA	0.896715	0.862	0.447	3.24821e-100	1.17978e-95
TAN-3	TXNIP	0.89766	0.989	0.774	5.17312e-100	1.87893e-95
TAN-3	CXCR2	0.918109	0.86	0.451	5.88606e-97	2.13788e-92
TAN-3	ZFP36	0.893532	0.953	0.703	2.18309e-96	7.9292e-92
TAN-3	PTGS2	1.13712	0.55	0.167	2.44204e-94	8.86972e-90
TAN-3	MGAM	1.48675	0.289	0.046	1.40241e-93	5.09368e-89
TAN-3	CDKN2D	1.42048	0.269	0.038	2.4089e-93	8.74936e-89
TAN-3	CXCR1	1.02198	0.686	0.265	2.78843e-92	1.01279e-87
TAN-3	FCGR3B	0.702478	0.969	0.744	5.47435e-92	1.98834e-87
TAN-3	CTSS	0.864437	0.878	0.536	2.03971e-91	7.40841e-87
TAN-3	XPO6	1.16515	0.548	0.174	2.90762e-90	1.05608e-85
TAN-3	MMP25	1.46591	0.339	0.068	4.19932e-90	1.52523e-85
TAN-3	APOBEC3A	1.30348	0.348	0.07	5.88099e-90	2.13604e-85
TAN-3	VIM	1.34669	0.584	0.226	5.9068e-89	2.14541e-84
TAN-3	S100A6	1.16479	0.679	0.3	1.35746e-88	4.93042e-84
TAN-3	CPPED1	1.28486	0.486	0.145	7.63557e-87	2.77332e-82
TAN-3	USP10	1.14393	0.51	0.156	1.18799e-84	4.3149e-80
TAN-3	MSL1	1.22957	0.49	0.149	1.40912e-84	5.11807e-80
TAN-3	CKAP4	1.50086	0.298	0.055	5.49463e-84	1.9957e-79
TAN-3	TKT	1.14068	0.477	0.137	2.10804e-82	7.6566e-78
TAN-3	GCA	0.879804	0.777	0.389	2.65732e-81	9.65164e-77
TAN-3	SELPLG	1.25288	0.377	0.09	4.43488e-81	1.61079e-76
TAN-3	SMAP2	0.68295	0.944	0.604	2.30427e-79	8.36935e-75
TAN-3	LRP10	1.10963	0.526	0.177	2.48376e-79	9.02125e-75
TAN-3	CYP4F3	1.37249	0.325	0.071	6.57806e-78	2.38922e-73
TAN-3	MSRB1	1.27077	0.37	0.091	1.13658e-77	4.12818e-73
TAN-3	STK17B	0.933978	0.662	0.284	1.04549e-73	3.79733e-69
TAN-3	KLF2	1.0089	0.721	0.364	1.187e-72	4.31129e-68
TAN-3	ITGB2	1.08276	0.517	0.187	5.87699e-71	2.13458e-66
TAN-3	STAT5B	1.19557	0.328	0.078	8.27023e-69	3.00383e-64
TAN-3	BIN2	1.22592	0.325	0.08	1.9533e-66	7.09457e-62
TAN-3	ABTB1	1.02962	0.392	0.112	3.77294e-66	1.37037e-61
TAN-3	R3HDM4	1.04343	0.481	0.172	3.27162e-65	1.18828e-60
TAN-3	MAPK14	1.28944	0.269	0.057	1.33599e-64	4.85247e-60
TAN-3	VSIR	0.792215	0.688	0.321	1.5762e-63	5.72492e-59
TAN-3	RGS18	1.22274	0.319	0.082	6.51933e-63	2.36788e-58
TAN-3	RIPOR2	0.630681	0.868	0.523	9.08813e-63	3.3009e-58
TAN-3	ARHGDIB	0.697258	0.82	0.492	7.42118e-60	2.69545e-55
TAN-3	TOB1	1.0931	0.483	0.182	1.63837e-59	5.95072e-55
TAN-3	LRRK2	0.801276	0.572	0.232	5.38251e-59	1.95498e-54
TAN-3	OAZ1	0.869421	0.593	0.272	2.12296e-58	7.71082e-54
TAN-3	CEBPD	0.883982	0.568	0.242	4.259e-58	1.54691e-53
TAN-3	TAGLN2	0.820869	0.768	0.492	6.41337e-58	2.3294e-53
TAN-3	APBB1IP	1.05086	0.367	0.115	3.28459e-56	1.193e-51
TAN-3	B4GALT5	1.10772	0.327	0.094	9.57905e-56	3.47921e-51
TAN-3	IL17RA	1.07874	0.341	0.101	5.56651e-55	2.02181e-50
TAN-3	FKBP5	0.729483	0.65	0.302	1.22199e-54	4.43837e-50
TAN-3	FGL2	0.884704	0.363	0.113	5.24563e-53	1.90527e-48
TAN-3	QPCT	0.999942	0.37	0.118	7.89585e-53	2.86785e-48
TAN-3	KPNB1	0.975649	0.399	0.137	5.06775e-52	1.84066e-47
TAN-3	IQGAP1	0.761115	0.668	0.365	1.26021e-51	4.57721e-47
TAN-3	VMP1	0.733705	0.688	0.357	1.38761e-51	5.03994e-47
TAN-3	ACTB	0.402374	0.987	0.874	3.73234e-51	1.35562e-46
TAN-3	WAS	0.822116	0.544	0.25	2.64671e-50	9.61312e-46
TAN-3	FOS	0.423092	0.998	0.916	3.32422e-50	1.20739e-45
TAN-3	NCF1C	1.08729	0.294	0.085	1.7853e-49	6.4844e-45
TAN-3	ARHGAP9	0.889868	0.485	0.201	3.95767e-49	1.43746e-44
TAN-3	DUSP1	0.417625	0.996	0.887	1.90312e-48	6.91232e-44
TAN-3	TALDO1	0.828862	0.494	0.21	1.43165e-47	5.1999e-43
TAN-3	SLC44A2	1.06522	0.272	0.076	2.55938e-47	9.29591e-43
TAN-3	FRAT2	1.0526	0.343	0.116	2.75569e-47	1.0009e-42
TAN-3	PLXNC1	1.0168	0.332	0.107	4.56376e-47	1.6576e-42
TAN-3	PRKDC	1.00571	0.289	0.085	3.94813e-46	1.434e-41
TAN-3	COTL1	0.801299	0.47	0.191	7.07417e-46	2.56941e-41
TAN-3	ZYX	0.862117	0.472	0.197	1.05271e-45	3.82354e-41
TAN-3	RTN3	0.705127	0.653	0.351	1.23115e-44	4.47166e-40
TAN-3	GNAI2	0.689298	0.555	0.263	4.92756e-44	1.78974e-39
TAN-3	MYO1F	0.769781	0.499	0.222	1.00398e-43	3.64655e-39
TAN-3	CREB5	0.980036	0.316	0.105	2.5634e-42	9.31054e-38
TAN-3	H3F3A	0.558823	0.668	0.345	3.29349e-42	1.19623e-37
TAN-3	SH3GLB1	0.995337	0.33	0.115	4.69128e-42	1.70392e-37
TAN-3	MIDN	0.916578	0.352	0.128	7.72512e-42	2.80584e-37
TAN-3	NCOA4	0.899369	0.361	0.134	7.15545e-41	2.59893e-36
TAN-3	JAML	0.710799	0.426	0.17	8.27225e-41	3.00457e-36
TAN-3	ACSL1	0.597132	0.646	0.332	1.06215e-40	3.85783e-36
TAN-3	MBOAT7	0.75611	0.512	0.242	8.10564e-40	2.94405e-35
TAN-3	IGF2R	0.778816	0.381	0.162	5.12312e-34	1.86077e-29
TAN-3	GMFG	0.615584	0.559	0.289	6.28323e-34	2.28213e-29
TAN-3	GPSM3	0.74	0.432	0.201	1.92638e-33	6.99679e-29
TAN-3	CD37	0.817082	0.294	0.108	2.14495e-33	7.79068e-29
TAN-3	GNAS	0.649635	0.463	0.217	2.4318e-33	8.83254e-29
TAN-3	PSAP	0.393917	0.806	0.547	1.09559e-32	3.97931e-28
TAN-3	CMTM2	0.683481	0.372	0.157	1.75461e-32	6.37291e-28
TAN-3	RNASET2	0.721851	0.388	0.171	4.28022e-32	1.55462e-27
TAN-3	SLC11A1	0.565391	0.495	0.239	5.18392e-32	1.88285e-27
TAN-3	MYH9	0.63054	0.541	0.292	1.18391e-31	4.30008e-27
TAN-3	TSEN34	0.744339	0.283	0.102	1.41441e-31	5.13726e-27
TAN-3	BTG2	0.513664	0.795	0.575	7.97126e-30	2.89524e-25
TAN-3	RAC2	0.468782	0.748	0.486	1.28309e-29	4.66031e-25
TAN-3	HIST1H2AC	0.666921	0.376	0.169	2.73005e-29	9.9158e-25
TAN-3	CD46	0.604745	0.405	0.183	4.17049e-29	1.51476e-24
TAN-3	CSGALNACT2	0.812177	0.278	0.107	1.07989e-28	3.92227e-24
TAN-3	CREBBP	0.765169	0.285	0.112	1.42057e-28	5.15965e-24
TAN-3	IRS2	0.514666	0.644	0.391	1.47146e-28	5.34448e-24
TAN-3	IFRD1	0.718419	0.299	0.119	2.43581e-28	8.84711e-24
TAN-3	PRKAR1A	0.595871	0.416	0.196	2.79863e-28	1.01649e-23
TAN-3	FAM126B	0.70224	0.256	0.094	3.62801e-28	1.31773e-23
TAN-3	PTPRC	0.423171	0.817	0.57	6.11695e-28	2.22174e-23
TAN-3	FPR1	0.309815	0.913	0.7	1.01506e-27	3.6868e-23
TAN-3	ANXA11	0.669548	0.343	0.149	1.02729e-27	3.73122e-23
TAN-3	BCL6	0.58769	0.387	0.177	2.71139e-27	9.84805e-23
TAN-3	ZDHHC18	0.758862	0.252	0.095	8.80557e-27	3.19827e-22
TAN-3	HSPA1A	0.339319	0.457	0.233	5.51254e-26	2.00221e-21
TAN-3	RHOG	0.500919	0.492	0.263	3.76312e-25	1.3668e-20
TAN-3	LILRB3	0.460363	0.606	0.364	4.70318e-25	1.70824e-20
TAN-3	NFKBIZ	0.678937	0.405	0.209	2.75803e-24	1.00174e-19
TAN-3	H3F3AP4	0.412299	0.528	0.276	3.38254e-24	1.22857e-19
TAN-3	MCL1	0.304793	0.953	0.761	1.03342e-23	3.7535e-19
TAN-3	NCF4	0.683519	0.254	0.102	1.15233e-23	4.18539e-19
TAN-3	CALM2	0.478504	0.555	0.313	1.49235e-23	5.42038e-19
TAN-3	ROCK1	0.509641	0.446	0.237	1.61061e-23	5.84991e-19
TAN-3	RASSF3	0.609817	0.327	0.148	2.80125e-23	1.01744e-18
TAN-3	MAP4K4	0.511925	0.309	0.134	3.74767e-23	1.36119e-18
TAN-3	PGD	0.552406	0.359	0.174	6.99922e-23	2.54219e-18
TAN-3	LCP1	0.335777	0.849	0.652	7.31722e-23	2.65769e-18
TAN-3	TSC22D3	0.451116	0.808	0.618	7.5571e-23	2.74481e-18
TAN-3	EVI2B	0.366653	0.811	0.565	7.66998e-23	2.78581e-18
TAN-3	YPEL3	0.428295	0.604	0.365	1.0275e-22	3.73197e-18
TAN-3	RNF130	0.510828	0.294	0.128	1.95514e-22	7.10128e-18
TAN-3	ZFP36L2	0.700264	0.265	0.113	2.06804e-22	7.51134e-18
TAN-3	PREX1	0.435022	0.559	0.332	1.90057e-20	6.90308e-16
TAN-3	PPP1R12A	0.511381	0.314	0.149	7.33183e-20	2.66299e-15
TAN-3	CSF3R	0.254758	0.909	0.742	1.78598e-19	6.48687e-15
TAN-3	RALB	0.451727	0.475	0.267	1.80337e-19	6.55001e-15
TAN-3	SH3KBP1	0.627598	0.289	0.136	3.30063e-19	1.19882e-14
TAN-3	MSN	0.410447	0.559	0.351	5.01498e-19	1.82149e-14
TAN-3	UBE2R2	0.479076	0.441	0.25	5.73236e-19	2.08205e-14
TAN-3	DNAJB1	0.361894	0.408	0.22	6.28553e-19	2.28297e-14
TAN-3	JUND	0.433571	0.612	0.418	6.43464e-19	2.33713e-14
TAN-3	TLE3	0.599998	0.309	0.155	2.26714e-18	8.23446e-14
TAN-3	ADAM8	0.476442	0.314	0.154	2.32578e-18	8.44748e-14
TAN-3	FYB1	0.267085	0.757	0.511	6.32686e-18	2.29798e-13
TAN-3	IER2	0.473889	0.475	0.284	6.87234e-18	2.4961e-13
TAN-3	CLEC4E	0.290489	0.804	0.57	8.38305e-18	3.04481e-13
TAN-3	KLF6	0.315732	0.708	0.515	2.1874e-17	7.94484e-13
TAN-3	SORL1	0.309571	0.644	0.402	3.84774e-17	1.39754e-12
TAN-3	TAPBP	0.529454	0.309	0.158	4.06898e-17	1.47789e-12
TAN-3	HCLS1	0.353618	0.724	0.544	4.31962e-17	1.56893e-12
TAN-3	TRIB1	0.439067	0.548	0.364	1.4978e-16	5.44017e-12
TAN-3	YWHAB	0.394691	0.428	0.252	1.59301e-16	5.78596e-12
TAN-3	CELF2	0.369298	0.436	0.248	2.24634e-16	8.15892e-12
TAN-3	MOB3A	0.508184	0.258	0.123	3.03935e-16	1.10392e-11
TAN-3	S100A11	0.324791	0.784	0.623	3.69328e-16	1.34144e-11
TAN-3	MYL6	0.345019	0.544	0.346	9.71791e-16	3.52964e-11
TAN-3	TYROBP	0.326737	0.67	0.472	1.0793e-15	3.92011e-11
TAN-3	EIF4G2	0.460351	0.292	0.15	1.3259e-15	4.81579e-11
TAN-3	RHOB	0.494957	0.388	0.226	1.61151e-15	5.85316e-11
TAN-3	CYTIP	0.319852	0.528	0.333	2.80248e-15	1.01789e-10
TAN-3	LBR	0.371574	0.356	0.192	3.14524e-15	1.14238e-10
TAN-3	CFLAR	0.393165	0.526	0.345	4.37496e-15	1.58903e-10
TAN-3	OSBPL8	0.389807	0.354	0.195	7.08223e-15	2.57234e-10
TAN-3	HCK	0.424795	0.336	0.181	8.34873e-15	3.03234e-10
TAN-3	LSP1	0.408102	0.475	0.294	1.17922e-14	4.28306e-10
TAN-3	LILRB2	0.471106	0.296	0.156	1.32437e-14	4.81024e-10
TAN-3	TLN1	0.465463	0.338	0.189	1.74447e-14	6.33611e-10
TAN-3	UBALD2	0.506376	0.256	0.13	2.63667e-14	9.57664e-10
TAN-3	KCNJ15	0.430984	0.29	0.154	3.09623e-14	1.12458e-09
TAN-3	CALM1	0.412645	0.388	0.227	4.07036e-14	1.4784e-09
TAN-3	PECAM1	0.350524	0.356	0.199	4.09479e-14	1.48727e-09
TAN-3	NUMB	0.389464	0.318	0.171	6.81928e-14	2.47683e-09
TAN-3	AQP9	0.320145	0.55	0.36	2.881e-13	1.04641e-08
TAN-3	SKAP2	0.332948	0.399	0.235	3.28891e-13	1.19456e-08
TAN-3	THEMIS2	0.384888	0.397	0.236	3.35905e-13	1.22004e-08
TAN-3	FOSB	0.318014	0.628	0.452	4.13122e-13	1.5005e-08
TAN-3	ERGIC1	0.504203	0.325	0.187	6.13629e-13	2.22876e-08
TAN-3	EFHD2	0.338456	0.336	0.19	6.39623e-13	2.32318e-08
TAN-3	CAPZB	0.315715	0.426	0.26	6.80615e-13	2.47206e-08
TAN-3	HSPA8	0.485022	0.272	0.149	9.13751e-13	3.31884e-08
TAN-3	UBC	0.388035	0.416	0.259	1.50482e-12	5.46565e-08
TAN-3	SIRPB1	0.299968	0.379	0.221	1.66712e-12	6.05516e-08
TAN-3	GBP2	0.368101	0.285	0.154	1.76083e-12	6.39553e-08
TAN-3	MYADM	0.401706	0.319	0.182	2.82346e-12	1.02551e-07
TAN-3	NFIL3	0.400688	0.301	0.17	4.61771e-12	1.6772e-07
TAN-3	IRF1	0.412912	0.29	0.162	5.12755e-12	1.86238e-07
TAN-3	RASSF2	0.348119	0.363	0.218	1.72292e-11	6.25781e-07
TAN-3	HSD17B11	0.30492	0.334	0.197	4.58558e-11	1.66553e-06
TAN-3	KIAA1551	0.274387	0.548	0.388	7.07157e-11	2.56846e-06
TAN-3	STX3	0.346869	0.345	0.21	1.15508e-10	4.19537e-06
TAN-3	PHC2	0.275657	0.566	0.388	1.19416e-10	4.33729e-06
TAN-3	PTPRE	0.395609	0.258	0.146	2.00968e-10	7.29934e-06
TAN-3	DOK3	0.317544	0.352	0.22	2.87144e-10	1.04293e-05
TAN-3	SSH2	0.434498	0.303	0.187	7.40524e-10	2.68966e-05
TAN-3	CCND3	0.302055	0.276	0.161	1.30933e-09	4.75561e-05
TAN-3	RPS9	0.352641	0.265	0.154	1.45098e-09	5.2701e-05
TAN-3	SOCS3	0.30277	0.483	0.345	1.6347e-09	5.93738e-05
TAN-3	NRBF2	0.344878	0.267	0.157	2.4255e-09	8.80964e-05
TAN-3	TXN	0.250701	0.341	0.214	7.20726e-09	0.000261775
TAN-3	VAPA	0.271521	0.334	0.213	1.41441e-08	0.000513729
TAN-3	ACAP2	0.30315	0.256	0.153	1.48355e-08	0.000538841
TAN-3	MBNL1	0.254268	0.292	0.179	1.69338e-08	0.000615052
TAN-3	SEMA4D	0.305765	0.318	0.205	2.00622e-08	0.00072868
TAN-3	PTBP3	0.276157	0.37	0.247	2.05588e-08	0.000746717
TAN-3	SHISA5	0.287855	0.258	0.154	3.07387e-08	0.00111646
TAN-4	IFIT1	2.71881	0.636	0.061	3.64126e-280	1.32254e-275
TAN-4	IFIT3	2.32542	0.873	0.218	2.25701e-221	8.19767e-217
TAN-4	IFIT2	2.47312	0.842	0.227	3.31672e-193	1.20467e-188
TAN-4	RSAD2	2.50171	0.53	0.072	9.23262e-179	3.35338e-174
TAN-4	HERC5	2.411	0.332	0.021	1.67249e-174	6.07464e-170
TAN-4	MX1	2.19825	0.404	0.049	1.14148e-142	4.14599e-138
TAN-4	OAS3	2.03861	0.348	0.043	2.01396e-117	7.3149e-113
TAN-4	DDX58	1.83482	0.361	0.055	2.01403e-102	7.31516e-98
TAN-4	ISG15	2.16964	0.293	0.036	1.52783e-100	5.54922e-96
TAN-4	IFIT5	1.77622	0.301	0.041	6.78949e-93	2.46601e-88
TAN-4	IFI44L	1.76681	0.33	0.052	3.06293e-89	1.11249e-84
TAN-4	IFI6	1.42442	0.691	0.299	5.75708e-81	2.09103e-76
TAN-4	SAMD9L	1.54774	0.406	0.092	7.18935e-78	2.61124e-73
TAN-4	PARP14	1.52419	0.427	0.108	1.04304e-71	3.78841e-67
TAN-4	IFI44	1.81091	0.288	0.049	1.3262e-71	4.8169e-67
TAN-4	TNFSF10	1.89968	0.327	0.071	1.71966e-66	6.24597e-62
TAN-4	GBP1	1.50023	0.456	0.135	1.04543e-65	3.79709e-61
TAN-4	APOL6	1.53957	0.314	0.063	1.56461e-65	5.68281e-61
TAN-4	SAMD9	1.39351	0.491	0.155	5.13692e-65	1.86578e-60
TAN-4	GBP4	1.64338	0.306	0.063	3.98365e-63	1.4469e-58
TAN-4	EIF2AK2	1.36853	0.385	0.105	8.83061e-59	3.20737e-54
TAN-4	GBP5	1.26918	0.483	0.169	2.82616e-54	1.02649e-49
TAN-4	TNFSF13B	1.50654	0.314	0.078	6.36668e-53	2.31244e-48
TAN-4	IFIH1	1.44044	0.33	0.085	8.00005e-53	2.9057e-48
TAN-4	SP110	0.986672	0.609	0.297	5.82284e-44	2.11491e-39
TAN-4	MX2	1.12509	0.454	0.178	4.28695e-43	1.55706e-38
TAN-4	TRIM22	1.01768	0.504	0.211	5.17522e-43	1.87969e-38
TAN-4	STAT1	1.13428	0.375	0.127	4.58021e-41	1.66358e-36
TAN-4	ADAR	1.03852	0.48	0.197	1.28015e-40	4.64963e-36
TAN-4	RNF213	1.16569	0.43	0.168	3.29794e-40	1.19784e-35
TAN-4	EPSTI1	1.34906	0.277	0.076	5.16154e-40	1.87472e-35
TAN-4	IFITM3	0.770513	0.81	0.557	8.60497e-40	3.12541e-35
TAN-4	PARP9	1.0489	0.38	0.142	2.05616e-35	7.46818e-31
TAN-4	DDX60L	0.878385	0.496	0.235	1.55548e-32	5.64964e-28
TAN-4	NUB1	1.18707	0.319	0.115	5.13478e-32	1.865e-27
TAN-4	SP100	0.856364	0.507	0.266	2.1726e-28	7.89111e-24
TAN-4	TMEM123	1.00736	0.412	0.195	2.01221e-27	7.30857e-23
TAN-4	HLA-C	0.370151	0.982	0.895	2.55434e-27	9.27761e-23
TAN-4	UBE2L6	0.987897	0.251	0.083	8.24796e-26	2.99574e-21
TAN-4	NMI	0.798697	0.364	0.171	5.15269e-21	1.87151e-16
TAN-4	MNDA	0.543433	0.707	0.475	6.78423e-21	2.4641e-16
TAN-4	SAT1	0.419351	0.979	0.891	2.72904e-20	9.91216e-16
TAN-4	SMCHD1	0.511291	0.628	0.412	2.2697e-19	8.24379e-15
TAN-4	IRF1	0.928246	0.332	0.163	7.1046e-19	2.58046e-14
TAN-4	SHISA5	0.729961	0.322	0.153	3.81627e-18	1.38611e-13
TAN-4	FCGR3B	0.424633	0.881	0.76	7.31399e-18	2.65651e-13
TAN-4	GBP2	0.793195	0.322	0.156	2.91537e-17	1.05889e-12
TAN-4	IFI16	0.653738	0.427	0.243	2.68993e-16	9.77008e-12
TAN-4	CHMP5	0.738092	0.288	0.136	7.04693e-16	2.55952e-11
TAN-4	FYB1	0.537781	0.673	0.528	1.97796e-15	7.18414e-11
TAN-4	ITM2B	0.297234	0.955	0.837	2.0173e-15	7.32705e-11
TAN-4	TXNIP	0.330896	0.931	0.787	2.53658e-15	9.21311e-11
TAN-4	TRIM38	0.75382	0.253	0.117	1.18311e-14	4.29717e-10
TAN-4	CIR1	0.632647	0.34	0.181	2.7233e-14	9.8913e-10
TAN-4	GIMAP4	0.772736	0.285	0.144	3.16544e-14	1.14972e-09
TAN-4	FFAR2	0.721831	0.338	0.195	3.0181e-12	1.0962e-07
TAN-4	PLSCR1	0.593158	0.483	0.334	3.11968e-11	1.1331e-06
TAN-4	SELL	0.445833	0.544	0.371	9.1225e-11	3.31338e-06
TAN-4	TNFAIP6	0.776151	0.269	0.157	5.36326e-09	0.000194799
TAN-4	CLEC4E	0.309532	0.715	0.586	2.25113e-08	0.000817634
TAN-4	NBN	0.419016	0.412	0.281	3.1028e-08	0.00112697
TAN-4	BAZ1A	0.552477	0.364	0.244	3.69762e-08	0.00134301
TAN-4	CD74	0.390076	0.686	0.591	3.88601e-08	0.00141144
TAN-4	TMEM154	0.265377	0.538	0.403	5.18868e-07	0.0188458
TAN-4	WIPF1	0.304445	0.525	0.41	1.70105e-06	0.0617838
TAN-4	SERPINB1	0.395866	0.42	0.306	1.88908e-06	0.0686132
TAN-4	P2RY13	0.341866	0.343	0.232	3.20456e-06	0.116393
TAN-4	IL13RA1	0.3495	0.385	0.274	4.21212e-06	0.152988
TAN-4	LRRK2	0.351428	0.372	0.261	7.20686e-06	0.26176
TAN-4	ARID4B	0.355059	0.325	0.225	8.10564e-06	0.294405
TAN-4	MBNL1	0.283455	0.28	0.184	1.61066e-05	0.585008
TAN-4	CSF2RB	0.410838	0.401	0.313	2.79476e-05	1
TAN-4	RCSD1	0.354704	0.293	0.206	3.82666e-05	1
TAN-4	PELI1	0.258413	0.567	0.465	5.8861e-05	1
TAN-4	CYBB	0.448461	0.356	0.273	6.93107e-05	1
TAN-4	KIAA1551	0.260365	0.485	0.399	0.000272078	1
TAN-4	AIF1	0.269269	0.414	0.325	0.00027965	1
TAN-4	SEMA4D	0.25202	0.293	0.211	0.000307371	1
TAN-4	ARL6IP5	0.325509	0.306	0.225	0.000336071	1
TAN-4	THEMIS2	0.324982	0.325	0.249	0.000372001	1
TAN-4	SCAF11	0.271824	0.301	0.227	0.000820586	1
TAN-4	TNFAIP2	0.269782	0.359	0.29	0.00418354	1
TAN-4	ZCCHC6	0.253096	0.335	0.269	0.0059846	1
TAN-4	CHD2	0.255734	0.261	0.21	0.00894201	1
TAN-5	AREG	4.00854	0.405	0.026	1.51563e-87	5.50493e-83
TAN-5	MT-CO1	1.60152	0.929	0.689	1.29039e-28	4.68682e-24
TAN-5	MT-CO3	0.996428	0.869	0.752	4.04394e-16	1.4688e-11
TAN-5	MT-CO2	0.916504	0.881	0.834	2.00668e-15	7.28845e-11
TAN-5	RPS4X	2.13388	0.262	0.07	4.05623e-13	1.47326e-08
TAN-5	MTCO1P12	1.78597	0.5	0.258	2.64165e-12	9.59474e-08
TAN-5	MT-ND4	0.774073	0.881	0.822	1.92969e-11	7.00884e-07
TAN-5	LUC7L3	2.11565	0.262	0.08	6.99645e-11	2.54118e-06
TAN-5	MT-ND3	0.758614	0.845	0.774	9.41731e-11	3.42046e-06
TAN-5	RPS29	1.67201	0.417	0.205	3.47121e-10	1.26078e-05
TAN-5	HSP90AA1	1.27671	0.643	0.477	4.7877e-10	1.73894e-05
TAN-5	RPL32	1.45744	0.429	0.218	1.9285e-09	7.00451e-05
TAN-5	MT-ATP6	0.919159	0.762	0.703	3.09922e-09	0.000112567
TAN-5	RPL31	1.62087	0.381	0.186	3.70943e-09	0.00013473
TAN-5	RGS1	2.20192	0.274	0.103	7.58283e-09	0.000275416
TAN-5	RPLP1	1.74465	0.286	0.113	2.16209e-08	0.000785293
TAN-5	RPL37	1.29886	0.44	0.274	9.35436e-08	0.0033976
TAN-5	RPS13	1.61329	0.345	0.169	9.58633e-08	0.00348185
TAN-5	RPS20	1.65395	0.345	0.176	2.80398e-07	0.0101843
TAN-5	HLA-DRA	0.784802	0.56	0.384	1.17533e-06	0.042689
TAN-5	MT-ND6	1.31904	0.452	0.309	2.62135e-06	0.09521
TAN-5	HSPA1A	0.54414	0.429	0.255	4.61475e-06	0.167612
TAN-5	RPL27A	1.23759	0.405	0.274	6.71329e-06	0.243833
TAN-5	MT-ND2	0.619649	0.786	0.753	1.38471e-05	0.502941
TAN-5	PTMA	1.25593	0.357	0.216	3.2941e-05	1
TAN-5	RPL37A	1.42501	0.321	0.194	3.86798e-05	1
TAN-5	CD74	0.717601	0.655	0.597	7.4534e-05	1
TAN-5	EEF1A1	1.26432	0.31	0.182	8.26333e-05	1
TAN-5	RPS24	1.31193	0.31	0.18	0.000101791	1
TAN-5	CTSB	1.01373	0.44	0.365	0.000235974	1
TAN-5	RPS16	1.27038	0.274	0.16	0.000268072	1
TAN-5	PABPC1	0.750669	0.512	0.458	0.000563494	1
TAN-5	MT-ND5	0.906835	0.524	0.468	0.00056691	1
TAN-5	HSP90AB1	1.40289	0.262	0.156	0.000747526	1
TAN-5	MT-CYB	0.545388	0.726	0.746	0.000775769	1
TAN-5	RPL34	1.17767	0.44	0.378	0.00115319	1
TAN-5	MALAT1	0.470908	0.869	0.992	0.00139069	1
TAN-5	RPL23	1.17994	0.333	0.246	0.0016207	1
TAN-5	RPS6	1.29804	0.298	0.205	0.00216813	1
TAN-5	RPL21	1.21928	0.333	0.258	0.00299663	1
TAN-5	RBM25	0.992461	0.286	0.196	0.0043691	1
TAN-5	RPS27A	0.946134	0.333	0.263	0.0069558	1
