# Supplementary material for: Single-cell RNA-seq analysis reveals BHLHE40-driven pro-tumour neutrophils with hyperactivated glycolysis in pancreatic tumour microenvironment
Source: HighWire-hosted journal article supplement (doi:10.1136/gutjnl-2021-326070), 2022-06-10
Supplement: gutjnl-2021-326070supp010_data_supplement.xlsx [file gutjnl-2021-326070supp010_data_supplement.xlsx]

## Sheet: Sheet1
Table S10. Gene sets associated with neutrophil functions
Neutrophil-associated function	Gene set
Innate immune response	GO: 0002226
Phagocytosis	GO: 0006909
FcγR-mediated phagocytosis	KEGG: map04666
Respiratory burst	GO: 0045730
Neutrophil granules	CEACAM6, AZU1, GLA, FUCA2, DEFA1, CTSA, PRTN3, CD63, CTSG, ELANE, MPO, DPP7, HEXA, SDCBP, CMTM6, LAMP1, GALNS, MAN2B1, HEXB, BPI, ACPP, GLB1, ORM2, RNASET2, GNS, ARG1, VNN1, MS4A3, CHI3L1, PTX3, PRG3, FOLR3, TSPAN14, C3AR1, OLFM4, LAIR1, ADAM10, LCN2, PLAU, HP, LTF, TMBIM1, PGLYRP1, CEACAM1, CLEC5A, CD59, GGH, ITGAL, RETN, ITGAM, SLC11A1, MMP9, TNFAIP6, FCER1G, LILRA3, LILRB2, CTSS, PRSS3, CTSH, …
Antigen presentation	KEGG: map04612
Inflammatory response	GO: 0006954
Chemokine activity	GO: 0008009
Cytokine activity	GO: 0005125
Angiogenesis	PROK2, VEGFA, VEGFB, VEGFC, VEGFD, MMP9, CXCL8, MMP2, TGFB1, TGFB2, TGFB3, CCL2, FGF1, FGF2, ANGPT1, ANGPT2, ANGPT4, EFNA1, EFNA2, PGF, PDGFA, PDGFB, PDGFC, PDGFD, EGF, HGF, FGF8, FGF6, FGF9, FGF10, FGF18, FGF4, DLL4, JAG1, IL6, IL1A, IL1B, IL17A, CXCL12, CXCL1, CXCL2, CXCL3, CXCL5, CXCL6, TGFA, EFNB1, TNF, EPO, ADM, SEMA4D, MMP8
